# Supplementary material for: Target profiling of an antimetastatic RAPTA agent by chemical proteomics: relevance to the mode of action
Source: PubMed Central journal article supplement — Chem Sci. 2015 Feb 9;6(4):2449–56. doi: 10.1039/c4sc03905j (PMC5647740; doi:10.1039/c4sc03905j), 2015-02-09
Supplement: SC-006-C4SC03905J-s001.pdf [file SC-006-C4SC03905J-s001.pdf]

## Supporting Information

to

### Target Profiling of an Antimetastatic RAPTA Agent by Chemical Proteomics: Relevance to the Mode of Action

Maria V. Babak,<sup>a,b</sup> Samuel M. Meier,<sup>c</sup> Kilian Huber,<sup>d</sup> Jóhannes Reynisson,<sup>a</sup> Anton A. Legin,<sup>b</sup> Michael A. Jakupec,<sup>b</sup> Alexander Roller,<sup>b</sup> Alexey Stukalov,<sup>d</sup> Manuela Gridling,<sup>d</sup> Keiryn L. Bennett,<sup>d</sup> Jacques Colinge,<sup>d</sup> Walter Berger,<sup>e</sup> Paul J. Dyson,<sup>f</sup> Giulio Superti-Furga,<sup>d</sup> Bernhard K. Keppler,<sup>b</sup> Christian G. Hartinger\*<sup>a</sup>

<sup>a</sup> School of Chemical Sciences, University of Auckland, Private Bag 92019, Auckland 1142, New Zealand

<sup>b</sup> Institute of Inorganic Chemistry, University of Vienna, Waehringer Str. 42, A-1090 Vienna, Austria

<sup>c</sup> Institute of Analytical Chemistry, University of Vienna, Waehringer Str. 38, A-1090 Vienna, Austria

<sup>d</sup> CeMM Research Center for Molecular Medicine, Lazarettgasse 14, AKH BT 25.3, A-1090 Vienna, Austria

<sup>e</sup> Department of Medicine I, Institute of Cancer Research, Medical University Vienna, Borschkegasse 8a, A-1090 Vienna, Austria

<sup>f</sup> Institut des Sciences et Ingénierie Chimiques, Ecole Polytechnique Fédérale de Lausanne, CH-1015 Lausanne, Switzerland

#### Table of Contents

Experimental details

Crystal data, details of data collection and key bond lengths and angles for **1** and **3**

Concentration–effect curves of complexes **1–3** in the human ovarian cancer cell line CH1

Stability and protein binding studies using NMR spectroscopy and MS

List of proteins identified by chemical proteomics.

## Experimental Details

**Materials and Methods.** Materials from chemical suppliers were used as received and all the reactions were carried out under argon atmosphere in anhydrous solvents.  $\text{RuCl}_3 \cdot 3\text{H}_2\text{O}$  was purchased from Johnson Matthey.  $[(\eta^6\text{-Benzylammonium})\text{RuCl}_2]_2\text{Cl}_2$  (**a**),<sup>1</sup> 1,4-cyclohexadiene-1-methanamine (**b**),<sup>2</sup> and 1,3,5-triaza-7-phosphaadamantane (PTA)<sup>3</sup> were prepared according to literature procedures. Methanol was dried and distilled over Mg under an argon atmosphere. D-Biotin and 6-biotinylamino-hexanoic acid-*N*-hydroxysuccinimidyl ester were purchased from Iris Biotech GMBH, triethylamine (99%) and dimethylsulfoxide (p.a.) from Acros, acetic anhydride ( $\geq 99.0\%$ ) and ethanolamine (p.a.) from Fluka, *N,N*-dimethyl formamide (absolute, over molecular sieves,  $\geq 99.5\%$ ) from Aldrich, sodium dodecyl sulphate ( $\geq 98.5\%$ ), HEPES (99.5%), ubiquitin (from bovine erythrocytes) and horse heart cytochrome-*c* were from Sigma and tetramethylammonium acetate ( $>98\%$ ) from TCI. The isolation of products was conducted without any special precautions. Elemental analyses were performed by the Microanalytical Laboratory of the Faculty of Chemistry of the University of Vienna. Electrospray ionization mass spectrometry was carried out with a Bruker Esquire 3000 instrument (Bruker Daltonics, Bremen, Germany), MilliQ water (18.2 M $\Omega$ ; Millipore Synergy 185 UV Ultrapure Water System; Molsheim, France) and methanol (VWR Int., HiPerSolv, CHROMANORM) were used as solvents for ESI-MS studies. The  $^1\text{H}$  and  $^{31}\text{P}$  NMR spectra were recorded at 500.10 and 202.44 MHz on a Bruker FT-NMR spectrometer Avance IITM 500 MHz.  $^1\text{H}$  NMR kinetic experiments were measured at 500.32 MHz on a Bruker DPX500 (Ultrasield Magnet). Chemical shifts are given in ppm relative to the residual solvent peak.

**X-ray Diffraction Analysis.** X-ray diffraction measurements were performed on a Bruker X8 APEX II CCD diffractometer at 100 K. Single crystals were positioned at 35 mm from the detector, and 1112 and 2123 frames were measured, each for 60 and 20 s over  $1^\circ$  scan width for **1** and **3**, respectively. The data were processed using SAINT software.<sup>4</sup> Crystal data, data collection parameters, and structure refinement details for **1** and **3** are given in Table S1 and key bond lengths and angles in Table S2. The structures were solved by direct methods and refined by full-matrix least-squares techniques. Non-hydrogen atoms were refined with anisotropic displacement parameters. H atoms were placed at calculated positions and refined as riding atoms in the subsequent least squares model refinements. The isotropic thermal parameters were estimated to be 1.2 times the values of the equivalent isotropic thermal parameters of the non-hydrogen atoms to which hydrogen atoms are bonded. The following computer programs, equipment and tables were used: structure solution, SHELXS-97; refinement, SHELXL-2013,<sup>5</sup> OLEX2,<sup>6</sup> molecular diagrams, Mercury 3.0.

**Cell Lines and Culture Conditions.** The human cancer cell lines CH1 (ovarian carcinoma), A549 (non-small cell lung cancer) and SW480 (colon carcinoma) were grown in 75 cm<sup>2</sup> culture flasks (CytoOne, Starlab, UK) as adherent monolayer cultures in complete medium [*i.e.*, Minimal Essential Medium (MEM) supplemented with 10% heat-inactivated fetal bovine serum, 1 mM sodium pyruvate, 4 mM L-glutamine, and 1% from 100x nonessential amino acids ready-to-use stock (all purchased from Sigma-Aldrich Austria)]. Cell cultures were incubated at 37 °C in a moist atmosphere containing 5% CO<sub>2</sub>.

**Cytotoxicity in Cancer Cell Lines.** The cytotoxicity of the compounds was determined by means of colorimetric microculture assay (MTT assay, MTT = 3-(4,5-dimethyl-2-thiazolyl)-2,5-diphenyl-2H-tetrazolium bromide). The cells were harvested from culture flasks by trypsinization and seeded into 96-well microculture plates (CytoOne, Starlab, UK) in densities of 1 × 10<sup>3</sup> cells per well (for CH1), 2.5 × 10<sup>3</sup> cells per well (for SW480) and 3 × 10<sup>3</sup> cells per well (for A549). After 24 h preincubation of the cells, the test compounds were dissolved in complete medium and then added in aliquots of 100 μL per well. After continuous exposure for 96 h, solutions of the compounds were replaced with 86 μL RPMI 1640 medium (supplemented with 10% heat-inactivated fetal bovine serum and 2 mM L-glutamine) plus 14 μL MTT solution in phosphate-buffered saline (5 mg/mL). After incubation for 4 h, the medium/MTT mixtures were removed, and the formazan crystals formed by viable cells were dissolved in 150 μL of DMSO per well. Optical densities at 550 nm were measured with a microplate reader (ELx808 Absorbance Microplate Reader, Bio-Tek, USA), using a reference wavelength of 690 nm to correct for unspecific absorption. The quantity of viable cells was expressed in terms of T/C values by comparison to untreated control microcultures, and 50% inhibitory concentrations (IC<sub>50</sub>) were calculated from concentration-effect curves by interpolation. Evaluation is based on means from at least three independent experiments, each comprising three replicates per concentration level.

**Stability Studies.** Stability studies for **1** were performed on an AmaZon SL ion trap mass spectrometer using ESI Compass 1.3 software (Bruker Daltonics GmbH, Bremen, Germany). The samples were introduced by direct infusion at a flow rate of 180 μL/h. Compound **1** was dissolved in dimethylsulfoxide or dry N,N-dimethylformamide, respectively, and was incubated for the appropriate time. The sample was diluted with water : methanol (1 : 1) to a final concentration of 5 μM prior to injection into the instrument. Typical instrument parameters were as follows: average accumulation time ~1500 μs, dry gas 6.0 L/min, dry temperature 100 °C, end plate offset -500 V, HV capillary -3.5 kV, nebulizer 8 psi, RF Level 63%, trap drive 55.2. The Data Analysis 4.0 software package (Bruker Daltonics GmbH, Bremen, Germany) was used for processing of the raw data. Stability studies in aqueous solution were carried out as described below.

**Protein Binding Studies.** Compounds **1** or **3** (400  $\mu\text{M}$ ) and ubiquitin or cytochrome-c (400  $\mu\text{M}$ ) were dissolved in water and tetramethylammonium acetate (20 mM). These stock solutions were mixed to obtain a 2 : 1 metal-to-ubiquitin and a 3 : 1 metal-to-cytochrome-c molar ratio. The final protein concentration was 50  $\mu\text{M}$  and the mixtures were incubated at 37 °C in the dark using a thermomixer at 400 rpm (Ditabis, Pforzheim, Germany, HLC). References containing only **1** or **3** (50  $\mu\text{M}$ ) were incubated in parallel. Mass spectra of the incubation solutions were recorded after 2, 6, 24 and 48 h. The samples were analyzed using a MaXis Q-ToF mass spectrometer (Bruker Daltonics, Bremen, Germany) equipped with a Triversa nanomate (Advion Biosystems Inc., Ithaca, New York, USA) using ChipSoft 8.3 (Advion Biosystems Inc.) to control the nanomate. The general parameters were as follows: HV capillary –1.8 kV, gas flow 0.1 psi, dry temperature 180 °C, 200 Vpp funnel RF, 3 eV quadrupole ion energy, 150  $\mu\text{s}$  ion cooler transfer time and 15 °C nanomate sample plate temperature. The samples were diluted before injection to 1–3  $\mu\text{M}$  using water : methanol : formic acid (50 : 50 : 0.2). The spectra were recorded in positive ion mode over 0.5 min and averaged. The Data Analysis 4.0 software package was used for processing and maximum entropy deconvolution (automatic data point spacing and 30000 instrument resolving power) was applied. Relative abundances of adducts are expressed as percentage of the signal intensity of all assigned adducts with respect to the signal intensity of all assigned mass signals in the deconvoluted spectrum.

**Docking Experiments.** The structures were docked to a streptavidin crystal structure (3RY2, resolution 0.95 Å),<sup>7</sup> which was obtained from the Protein Data Bank (PDB).<sup>8,9</sup> The Scigress Ultraversion 7.7.0.47 program<sup>10</sup> was used to prepare the crystal structure for docking, *i.e.* hydrogen atoms were added, the co-crystallized ligand (biotin) was removed as well as crystallographic water molecules. The Scigress software suite was also used to build the compounds and the MM2<sup>11</sup> force field was used to optimize the structures. The center of the binding pocket was defined as the oxygen atom on the bicyclic system ( $x = 27.048$ ,  $y = 10.773$ ,  $z = 12.293$ ) in biotin with 10 Å radius. Fifty docking runs were allowed for each ligand with default search efficiency (100%). The basic amino acids lysine and arginine were defined as protonated. Furthermore, aspartic and glutamic acids were assumed to be deprotonated. All the bonds to the metal centre were fixed for the docking runs. The GoldScore (GS),<sup>12</sup> ChemScore (CS),<sup>13, 14</sup> ChemPLP<sup>15</sup> and ASP<sup>16</sup> algorithms in the GOLD v5.1 software suite were implemented to predict binding modes and relative energies of the ligands.

**Drug Pull-Down.** For preparation of cell lysates, CH1 cells (see above) were lysed with lysis buffer (50 mM Tris-HCl, 100 mM NaCl, 0.2% NP-40, 5% glycerol, 1.5 mM MgCl<sub>2</sub>, 25 mM NaF, 1 mM Na<sub>3</sub>VO<sub>4</sub>, 1 mM phenylmethylsulfonyl fluoride, 1 mM dithiothreitol (DTT), 10  $\mu\text{g}/\text{mL}$  TLCK, 1  $\mu\text{g}/\text{mL}$  leupeptin, 1  $\mu\text{g}/\text{mL}$  aprotinin, and 10  $\mu\text{g}/\text{mL}$  soybean trypsin inhibitor (Sigma), pH 7.5). Per pull-down experiment, 100  $\mu\text{L}$  streptavidin bead slurry (UltraLink Immobilized Streptavidin Plus, 50% in 20% ethanol, Pierce)

was distributed in Eppendorf tubes, centrifuged, and the supernatant removed. After washing with lysis buffer ( $3 \times 1$  mL), 50 mmol of biotin-conjugated compound **3** was added (prepared as described below) and incubated on a roto-shaker for 30 min at 4 °C. After centrifugation and one additional washing step, the beads were resuspended in CH1 lysates (10 mg per pull-down) and incubated on a roto-shaker for 2 h at 4 °C. For competition experiments, lysates were preincubated with 20  $\mu$ M of **2** for 20 min at 4 °C. After centrifugation, beads were transferred to spin columns (MoBiTec) and washed with lysis buffer (5 mL) and HEPES (2.5 mL), respectively. To elute bound proteins, the beads were treated with 250  $\mu$ L elution buffer (3 M urea, 50 mM formic acid) and the eluates were collected in glass vials.

**Liquid chromatography-mass spectrometry.** Mass spectrometry was performed on a hybrid LTQ Orbitrap Velos mass spectrometer (ThermoFisher Scientific, Waltham, MA, USA) using Xcalibur version 2.1.0 SP1.1160 coupled to an Agilent 1200 HPLC nanoflow system (dual pump with one precolumn and one analytical column; Agilent Biotechnologies, Palo Alto, CA, USA) via a nanoelectrospray ion source using liquid junction (Proxeon, Odense, Denmark). Solvents for HPLC separation of peptides were as follows: solvent A consisted of 0.4% formic acid (FA) in water and solvent B consisted of an aqueous solution of 0.4% FA in 70% methanol and 20% isopropanol. From a thermostatted microautosampler, 8  $\mu$ L of the tryptic peptide mixture was automatically loaded onto a trap column (Zorbax 300SB-C18 5  $\mu$ m,  $5 \times 0.3$  mm, Agilent Biotechnologies, Palo Alto, CA, USA) with a binary pump at a flow rate of 45  $\mu$ L/min. 0.1% trifluoroacetic acid (TFA) used for loading and washing the precolumn. After washing, the peptides were eluted by back-flushing onto a 16 cm fused silica analytical column with an inner diameter of 50  $\mu$ m packed with C18 reversed phase material (ReproSil-Pur 120 C18-AQ, 3  $\mu$ m, Dr. Maisch GmbH, Ammerbuch-Entringen, Germany). The peptides were eluted from the analytical column with a 27 min gradient ranging from 3 to 30% solvent B, followed by a 25 min gradient from 30 to 70% solvent B and, finally, a 7 min gradient from 70 to 100% solvent B at a constant flow rate of 100 nL/min.<sup>17</sup> The analyses were performed in a data-dependent acquisition mode and dynamic exclusion for selected ions was 60 s. A top 15 collision-induced dissociation (CID) method was used, and a single lock mass at  $m/z$  445.120024 ( $\text{Si}(\text{CH}_3)_2\text{O}_6$ ) was employed.<sup>18, 19</sup> Maximal ion accumulation time allowed in CID mode was 50 ms for  $\text{MS}^n$  in the LTQ and 500 ms in the C-trap. Automatic gain control was used to prevent overfilling of the ion traps and was set to 5000 in  $\text{MS}^n$  mode for the LTQ and  $10^6$  ions for a full FTMS scan. Intact peptides were detected in the Orbitrap Velos at 60000 resolution at  $m/z$  400. All samples were analyzed as biochemical and technical duplicates.

**Data analysis.** The acquired raw MS data files were processed with msconvert (ProteoWizard Library v2.1.2708) and converted into Mascot generic format (mgf) files. The resultant peak lists were searched against the human SwissProt database version v2012.05\_20120529 (36898 sequences, respectively, including isoforms, as obtained from varsplic.pl) with the search engines Mascot (v2.3.02, MatrixScience, London, UK) and Phenyx (v2.5.14, GeneBio, Geneva, Switzerland).<sup>19</sup> Submission to the search engines

was via a Perl script that performs an initial search with relatively broad mass tolerances (Mascot only) on both the precursor and fragment ions ( $\pm 10$  ppm and  $\pm 0.6$  Da, respectively). High-confidence peptide identifications were used to recalibrate all precursor and fragment ion masses prior to a second search with narrower mass tolerances ( $\pm 4$  ppm and  $\pm 0.3$  Da). One missed tryptic cleavage site was allowed. Carbamidomethyl cysteine was set as a fixed modification and oxidized methionine was set as a variable modification. To validate the proteins, Mascot and Phenyx output files were processed by internally-developed parsers. Proteins with  $\geq 2$  unique peptides above a threshold score T1, or with a single peptide above a score T2 were selected as unambiguous identifications. Additional peptides for these validated proteins with score  $> T3$  were also accepted. For Mascot and Phenyx, T1, T2 and T3 peptide scores were equal to 16, 40, 10 and 5.5, 9.5, 3.5, respectively (P-value  $< 0.001$ ). The validated proteins retrieved by the two algorithms were merged, any spectral conflicts discarded and grouped according to shared peptides. A false positive detection rate (FDR) of  $< 1\%$  and  $< 0.1\%$  (including the peptides exported with lower scores) was determined for proteins and peptides, respectively, by applying the same procedure against a reversed database.

## Syntheses

**Synthesis of  $[(\eta^6\text{-benzylammonium})\text{RuCl}_2(\text{PTA})]$  chloride (1).**  $[(\eta^6\text{-Benzylammonium})\text{RuCl}_2]_2\text{Cl}_2$  (**a**) (0.35 mmol, 221 mg) and PTA (0.98 mmol, 157 mg) were suspended in dry DMF (30 ml) and the mixture was stirred for 4 h. An orange precipitate formed, which was collected by filtration, washed with dichloromethane and diethyl ether and dried *in vacuo* (yield: 208 mg, 63%). Crystals suitable for X-ray diffraction analysis (red needles) were grown by slow diffusion of diethyl ether into a dry methanol solution. Calc. for  $\text{C}_{13}\text{H}_{22}\text{Cl}_3\text{N}_4\text{PRu}$  (472.74 g/mol): C, 33.03; H, 4.69; N, 11.85. Found: C, 33.02; H, 4.53; N, 11.47%. nESI-Q-TOF MS pos. mode:  $m/z$  401.0230  $[\text{RuCl}(\eta^6\text{-C}_6\text{H}_5(\text{CH}_2)\text{NH}_2)(\text{PTA})]^+$ , 436.9987  $[\text{RuCl}_2(\eta^6\text{-C}_6\text{H}_5(\text{CH}_2)\text{NH}_2)(\text{PTA}) + \text{H}]^+$ ; found 401.0230 ( $< 1$  ppm), 436.9994 (2 ppm).  $^1\text{H}$  NMR (500.10 MHz, DMSO- $d^6$ ): 8.39 (brs, 3H, NH<sub>3</sub>), 5.98 (brs, 4H,  $\eta^6$ -phenyl-H), 5.49 (brs, 1H,  $\eta^6$ -phenyl-H), 4.46 (s, 6H, PTA-CH<sub>2</sub>), 4.23 (s, 6H, PTA-CH<sub>2</sub>), 3.73 (brs, 2H, -CH<sub>2</sub>-NH).  $^{31}\text{P}\{^1\text{H}\}$  NMR (202.44 MHz; DMSO- $d^6$ ): -30.8 (s) ppm.

**Synthesis of biotin derivative (2).** Compound **1** (4.72 mg, 0.01 mmol) and 6-biotinylamino-hexanoic acid-*N*-hydroxysuccinimidyl ester (4.55 mg, 0.01 mmol) were suspended in dry DMF (2 ml). After addition of triethylamine (500  $\mu\text{l}$ ) and subsequent sonication the mixture was stirred for 24 h, which resulted in a clear red-brown solution. The solution was freeze-dried and *in situ* incubated with the beads. nESI-Q-TOF MS pos. mode:  $m/z$  704.2047  $[\text{Ru}\{\eta^6\text{-C}_6\text{H}_5(\text{CH}_2)\text{NH}(\text{linker-biotin})\}(\text{PTA}) - \text{H}]^+$ , 722.2146  $[\text{Ru}\{\eta^6\text{-C}_6\text{H}_5(\text{CH}_2)\text{NH}(\text{linker-biotin})\}(\text{PTA}) + \text{OH}]^+$ , 740.1821  $[\text{RuCl}\{\eta^6\text{-C}_6\text{H}_5(\text{CH}_2)\text{NH}(\text{linker-}$

biotin)}(PTA)]<sup>+</sup>, 776.1580 [RuCl<sub>2</sub>{η<sup>6</sup>-C<sub>6</sub>H<sub>5</sub>(CH<sub>2</sub>)NH(linker-biotin)}(PTA) + H]<sup>+</sup>; found 704.2087 (6 ppm), 722.2193 (7 ppm), 740.1851 (4 ppm), 776.1615 (5 ppm).

**Synthesis of *N*-(cyclohexa-1,4-dienylmethyl)acetamide (c).** The synthetic method was adapted from a reported procedure.<sup>20</sup> Upon addition of sodium dodecyl sulfate (47 mg, 0.163 mmol) to a stirred heterogeneous suspension of 1-methylamine-1,4-cyclohexadiene (**b**) (1472 mg, 13.5 mmol) in water (30 ml), a turbid colorless solution formed. Acetic anhydride (1652 mg, 1.52 ml, 16.2 mmol) was added dropwise to the solution over a period of 40 min. It was left at 0 °C overnight and a white precipitate formed which was collected by filtration, washed with a minimal amount of diethyl ether and dried *in vacuo*. The solution was extracted with ethyl acetate (2 × 30 ml) and the combined organic extracts were dried with Na<sub>2</sub>SO<sub>4</sub>. The solvent was removed on a rotary evaporator under reduced pressure resulting in a yellow oil. It was washed with a minimal amount of diethyl ether and dried *in vacuo* to yield a white powder (yield: 1182 mg, 58%). The product was used without additional purification. <sup>1</sup>H NMR (500.10 MHz, CDCl<sub>3</sub>): 5.73 (m, 2H, cyclohexadiene-CH=), 5.61 (brs, 1H, cyclohexadiene-CH=), 5.46 (m, 1H, -CONH), 3.80 (d, 2H, -CH<sub>2</sub>-NH, <sup>3</sup>J<sub>H,H</sub> = 5.8 Hz), 2.72 (m, 2H, cyclohexadiene-CH<sub>2</sub>), 2.64 (m, 2H, cyclohexadiene-CH<sub>2</sub>), 2.03 (s, 3H, -CH<sub>3</sub>).

**Synthesis of [(η<sup>6</sup>-*N*-benzylacetamide)RuCl<sub>2</sub>]<sub>2</sub> (d).** RuCl<sub>3</sub>·3H<sub>2</sub>O (863 mg, 4.15 mmol) was refluxed in dry methanol (50 ml) for 40 minutes. *N*-(Cyclohexa-1,4-dienylmethyl)acetamide (**c**) (1104 mg, 7.26 mmol) was added to the clear red-brown solution and the mixture was refluxed for 18 h at 80 °C. The dark brown solution turned initially bright green and then light orange, and eventually a brown-orange precipitate formed. The solution was filtered, washed with dichloromethane and diethyl ether and dried *in vacuo* to afford an orange powder (yield: 1172 mg, 88%). The product was used without additional purification. <sup>1</sup>H NMR (500.10 MHz, DMSO-d<sup>6</sup>): 8.34 (t, 1H, -CONH, <sup>3</sup>J<sub>H,H</sub> = 5.9 Hz), 6.05 (t, 2H, η<sup>6</sup>-phenyl-H, <sup>3</sup>J<sub>H,H</sub> = 5.9 Hz), 5.82 (d, 2H, η<sup>6</sup>-phenyl-H, <sup>3</sup>J<sub>H,H</sub> = 5.6 Hz), 5.80 (t, 1H, η<sup>6</sup>-phenyl-H, <sup>3</sup>J<sub>H,H</sub> = 5.6 Hz), 4.12 (d, 2H, -CH<sub>2</sub>-NH, <sup>3</sup>J<sub>H,H</sub> = 5.9 Hz), 1.88 (s, 3H, -CH<sub>3</sub>).

**Synthesis of [(η<sup>6</sup>-*N*-benzylacetamide)RuCl<sub>2</sub>(PTA)] (3).** [(η<sup>6</sup>-*N*-Benzylacetamide)RuCl<sub>2</sub>]<sub>2</sub> (**d**) (64 mg, 0.1 mmol) and PTA (47 mg, 0.3 mmol) were suspended in dry DMF (30 ml) and the mixture was stirred for 3 h. The resulting red-brown solution was filtered and the solvent was subsequently removed *in vacuo*. The remaining solid was washed with dichloromethane and diethyl ether and dried *in vacuo* (yield: 96 mg, 47%). Crystals suitable for X-ray diffraction analysis (red needles) were grown by slow diffusion of diethyl ether into a dry methanol solution. Calc. for C<sub>15</sub>H<sub>23</sub>Cl<sub>2</sub>N<sub>4</sub>PORu (478.32 g/mol): C, 37.67; H, 4.85; N, 11.71. Found: C, 37.39; H, 4.49; N, 11.33%. nESI-Q-TOF MS pos. mode: m/z 443.0331 [RuCl(η<sup>6</sup>-C<sub>6</sub>H<sub>5</sub>(CH<sub>2</sub>)NHCOCH<sub>3</sub>)(PTA)]<sup>+</sup>, 479.0090 [RuCl<sub>2</sub>(η<sup>6</sup>-C<sub>6</sub>H<sub>5</sub>(CH<sub>2</sub>)NHCOCH<sub>3</sub>)(PTA) + H]<sup>+</sup>;

found 443.0337 (1 ppm), 479.0101 (2 ppm).  $^1\text{H}$  NMR (500.10 MHz, DMSO- $d^6$ ): 8.30 (t, 1H, -CONH ,  $^3J_{\text{H,H}} = 5.9$  Hz), 5.87 (ddd, 2H,  $\eta^6$ -phenyl-H,  $^3J_{\text{H,H}} = 5.9$  Hz, 5.6 Hz, 2.1 Hz), 5.67 (d, 2H,  $\eta^6$ -phenyl-H,  $^3J_{\text{H,H}} = 5.9$  Hz), 5.33 (t, 1H,  $\eta^6$ -phenyl-H,  $^3J_{\text{H,H}} = 5.6$  Hz), 4.44 (s, 6H, PTA-CH<sub>2</sub>), 4.21 (s, 6H, PTA-CH<sub>2</sub>), 3.97 (d, 2H, -CH<sub>2</sub>-NH,  $^3J_{\text{H,H}} = 5.9$  Hz), 1.88 (s, 3H, -CH<sub>3</sub>).  $^{31}\text{P}\{^1\text{H}\}$  NMR (202.44 MHz; DMSO- $d^6$ ): -31.4 (s) ppm.

**Table S1.** Crystal data and details of data collection for **1** and **3**.

| Complex                                    | <b>1</b>                                                            | <b>3</b>                                                            |
|--------------------------------------------|---------------------------------------------------------------------|---------------------------------------------------------------------|
| CCDC no.                                   | 972667                                                              | 972668                                                              |
| Empirical formula                          | C <sub>14</sub> H <sub>26</sub> Cl <sub>3</sub> N <sub>4</sub> OPRu | C <sub>15</sub> H <sub>23</sub> Cl <sub>2</sub> N <sub>4</sub> OPRu |
| Fw                                         | 504.78                                                              | 478.31                                                              |
| Crystal system                             | monoclinic                                                          | triclinic                                                           |
| Space group                                | <i>P</i> 2 <sub>1</sub> / <i>n</i>                                  | <i>P</i> -1                                                         |
| <i>a</i> , Å                               | 6.9163(14)                                                          | 10.5379(5)                                                          |
| <i>b</i> , Å                               | 23.660(4)                                                           | 12.8283(6)                                                          |
| <i>c</i> , Å                               | 11.8396(19)                                                         | 13.7451(7)                                                          |
| $\alpha$ , deg                             | 90                                                                  | 100.766(2)                                                          |
| $\beta$ , deg                              | 97.078(9)                                                           | 97.279(2)                                                           |
| $\gamma$ , deg                             | 90                                                                  | 91.491(2)                                                           |
| <i>V</i> , Å <sup>3</sup>                  | 1922.6(6)                                                           | 1808.34(15)                                                         |
| <i>Z</i>                                   | 4                                                                   | 4                                                                   |
| $\lambda$ , Å                              | 0.71073                                                             | 0.71073                                                             |
| $\rho_{\text{calcd}}$ , g cm <sup>-3</sup> | 1.740                                                               | 1.757                                                               |
| Crystal size, mm <sup>3</sup>              | 0.30 × 0.05 × 0.02                                                  | 0.20 × 0.08 × 0.03                                                  |
| T, K                                       | 100(2)                                                              | 100(2)                                                              |
| $\mu$ , cm <sup>-1</sup>                   | 1.326                                                               | 1.262                                                               |
| Reflns collected/unique                    | 46451/3479                                                          | 80118/10580                                                         |
| [ <i>R</i> <sub>int</sub> ]                | 0.2078                                                              | 0.0489                                                              |
| <i>R</i> 1 <sup>a</sup>                    | 0.0548                                                              | 0.0203                                                              |
| <i>wR</i> 2 <sup>b</sup>                   | 0.1242                                                              | 0.0505                                                              |
| GOF <sup>c</sup>                           | 0.979                                                               | 1.036                                                               |

<sup>a</sup>  $R_1 = \Sigma||\text{Fo}| - \text{Fc}||\Sigma|\text{Fo}|$ , <sup>b</sup>  $wR_2 = \{\Sigma w(\text{Fo}^2 - \text{Fc}^2)^2/\Sigma w(\text{Fo}^2)^2\}^{1/2}$ . <sup>c</sup> GOF =  $\{\Sigma[w(\text{Fo}^2 - \text{Fc}^2)^2]/(n - p)\}^{1/2}$ , where *n* is the number of reflections and *p* is the total number of parameters refined.



**Table S2.** Key bond lengths and angles observed in the molecular structures of **1**, **3**<sup>b</sup> and RAPTA-C.

| <b>Bond lengths (Å) and angles (°)</b> | <b>1</b> | <b>3</b>   | <b>RAPTA-C<sup>a</sup></b> |
|----------------------------------------|----------|------------|----------------------------|
| Ru–arene <sub>centroid</sub> / Å       | 1.700    | 1.699      | 1.692                      |
| Ru–C <sub>substituted</sub> / Å        | 2.198(6) | 2.2834(14) | 2.207(10)<br>2.194(10)     |
| Ru–C <sub>unsubstituted</sub> / Å      | 2.189(6) | 2.168(2)   | 2.179(9)                   |
|                                        | 2.195(6) | 2.175(2)   | 2.182(10)                  |
|                                        | 2.201(7) | 2.181(2)   | 2.210(10)                  |
|                                        | 2.213(7) | 2.187(2)   | 2.240(10)                  |
|                                        | 2.267(6) | 2.2659(14) |                            |
| Ru–Cl1 / Å                             | 2.432(2) | 2.3966(4)  | 2.412(3)                   |
| Ru–Cl2 / Å                             | 2.414(2) | 2.4291(4)  | 2.429(2)                   |
| Ru–P1 / Å                              | 2.307(2) | 2.2916(4)  | 2.296(2)                   |
| P1–Ru–Cl1 / °                          | 82.28(6) | 87.477(13) | 87.09(9)                   |
| P1–Ru–Cl2 / °                          | 84.60(6) | 82.730(13) | 83.42(8)                   |
| Cl1–Ru–Cl2 / °                         | 88.55(6) | 88.068(13) | 87.25(8)                   |

<sup>a</sup> taken from Cambridge Structural Database, CCDC no. 161466<sup>b</sup> data for one of two independent molecules is given.

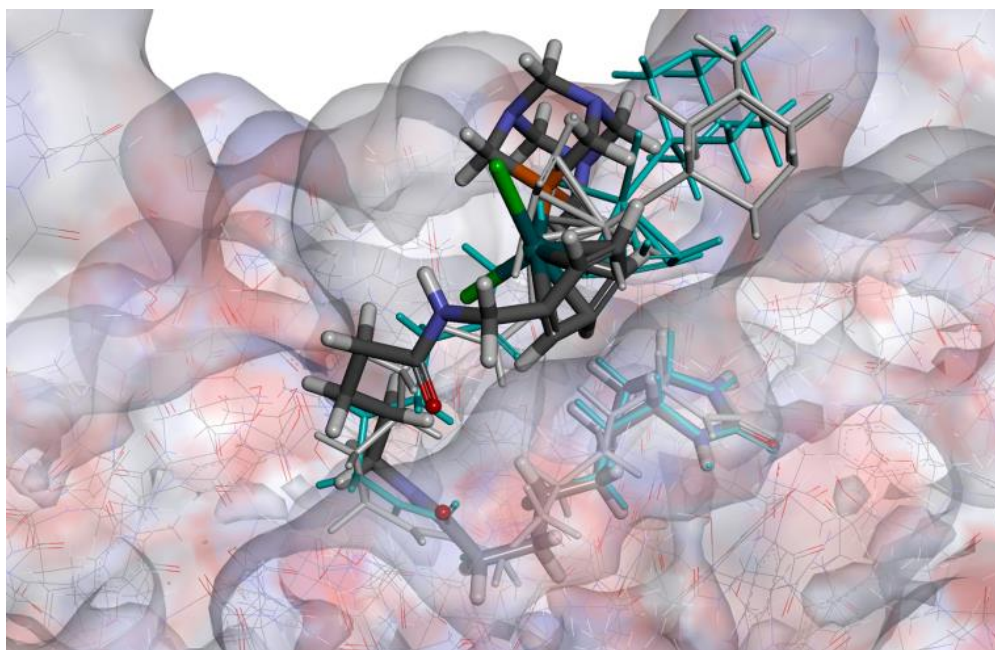

**Figure S1.** Docked configurations of ruthenium derivative **2** in the binding site of streptavidin for the three highest scoring GS runs overlaid. The biotin moiety shows good overlap with biotin observed in the crystal structure of the conjugate and the RAPTA part is flexible and accessible at the protein surface.

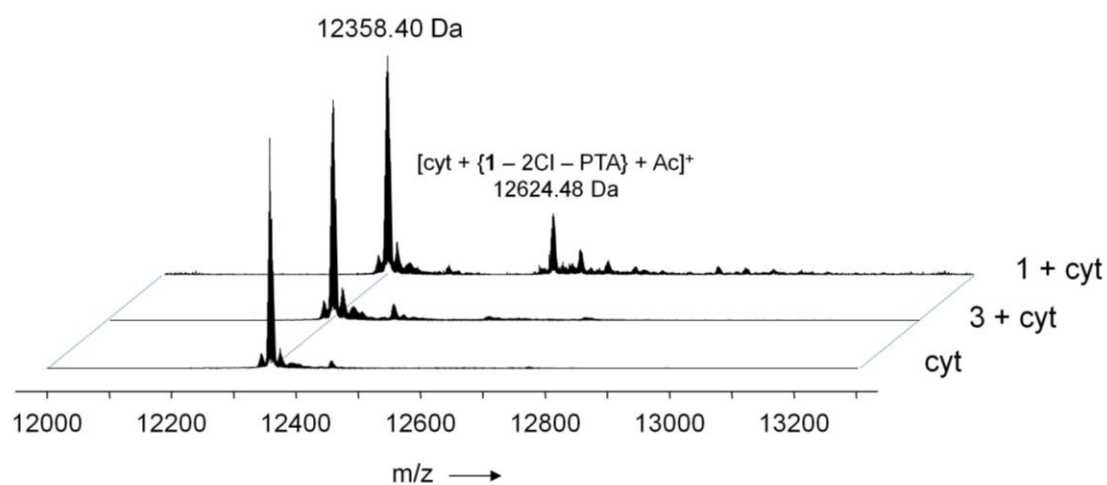

**Figure S2.** Deconvoluted mass spectra of incubation mixtures containing cytochrome c and **1** or **3** (molar ratio of 1 : 3) in tetramethylammonium acetate after 24 h.

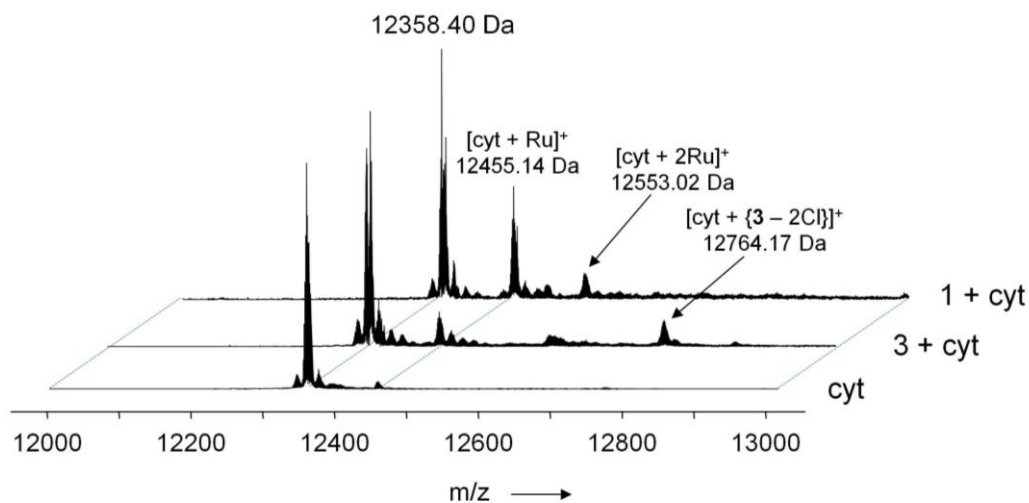

**Figure S3.** Deconvoluted mass spectra of aqueous incubation mixtures (pH 6.0) containing cytochrome c and **1** or **3** (molar ratio of 1 : 3) after 48 h.

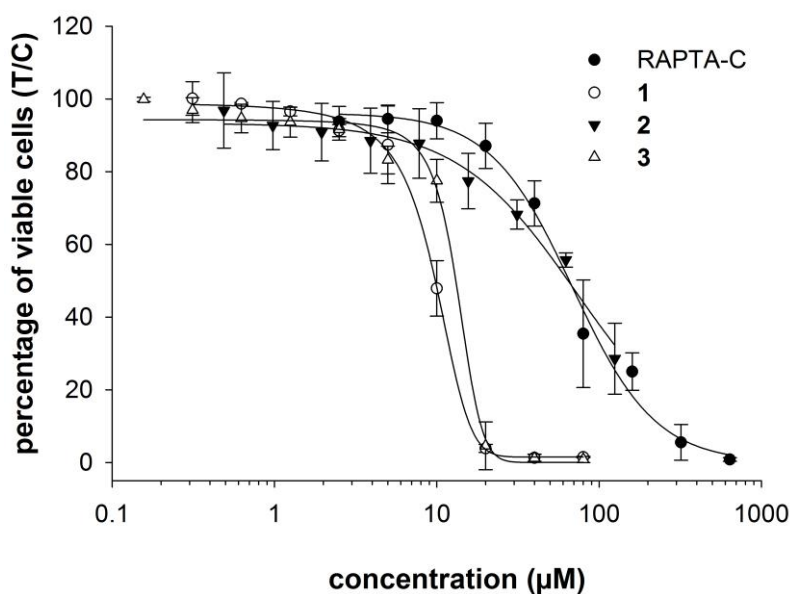

**Figure S4.** Concentration-effect curves of complexes **1–3** in the human ovarian cancer cell line CH1. Values were obtained by the MTT assay and are means  $\pm$  standard deviations from at least three independent experiments using exposure times of 96 h.

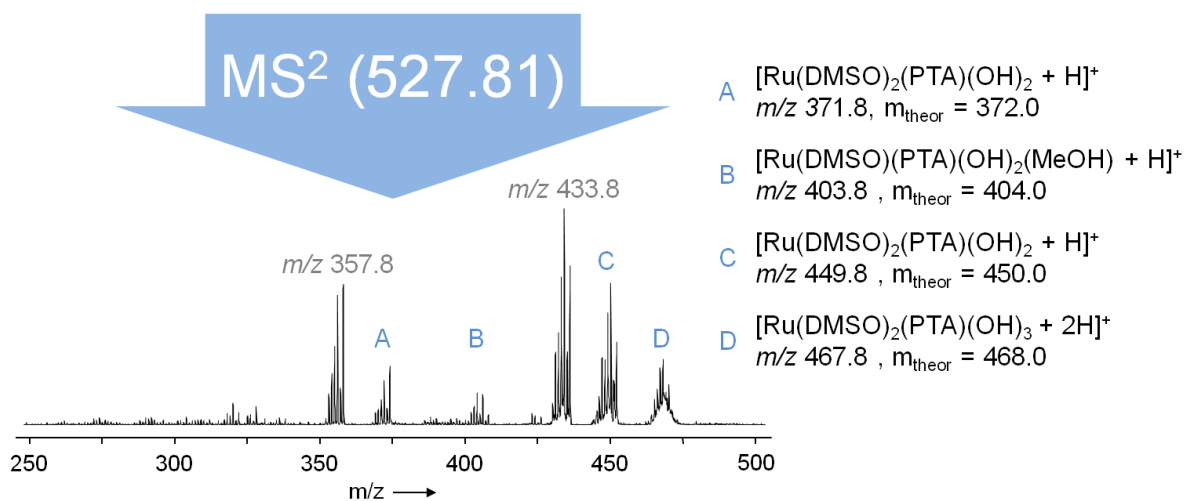

**Figure S5.** ESI-IT tandem mass spectrometric analysis of the signal at  $m/z$  527.81 from a solution of **1** in dimethylsulfoxide after 24 h.

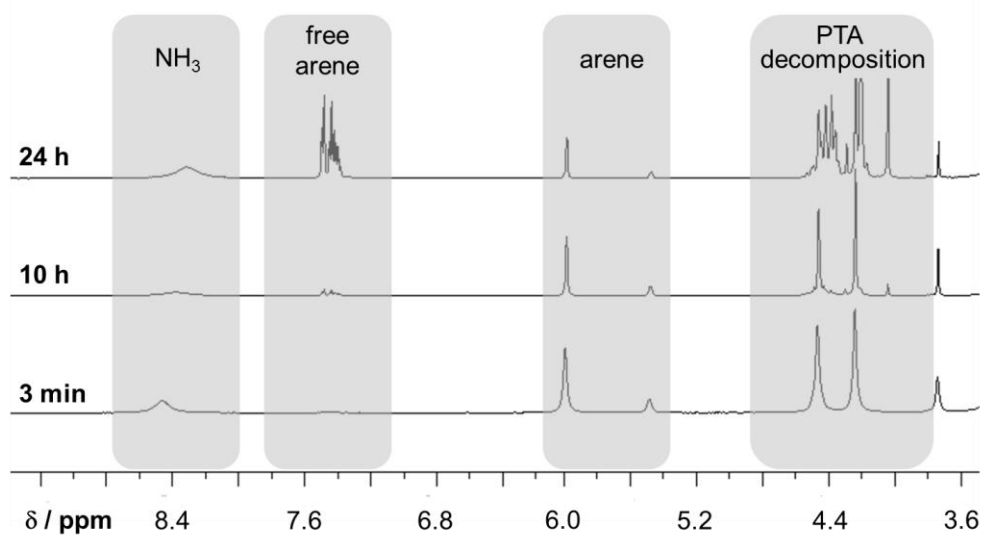

**Figure S6.** Time-dependent  $^1\text{H}$  NMR study on the stability of **1** in dimethylsulfoxide- $d_6$  at room temperature.

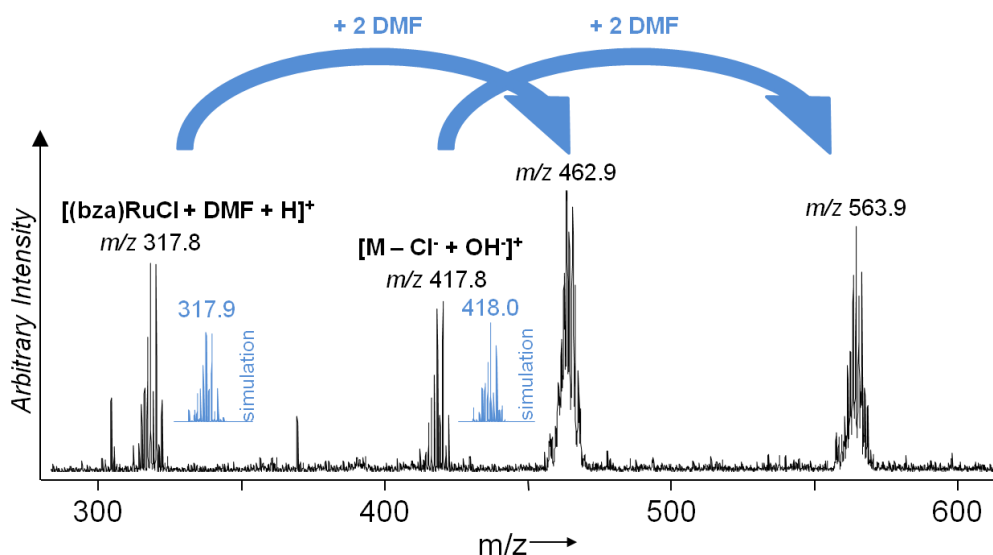

**Figure S7.** ESI-IT mass spectrum of a solution of **1** in dry dimethylformamide after 24 h. The solution was diluted with water : methanol (1 : 1) prior to injection into the mass spectrometer.

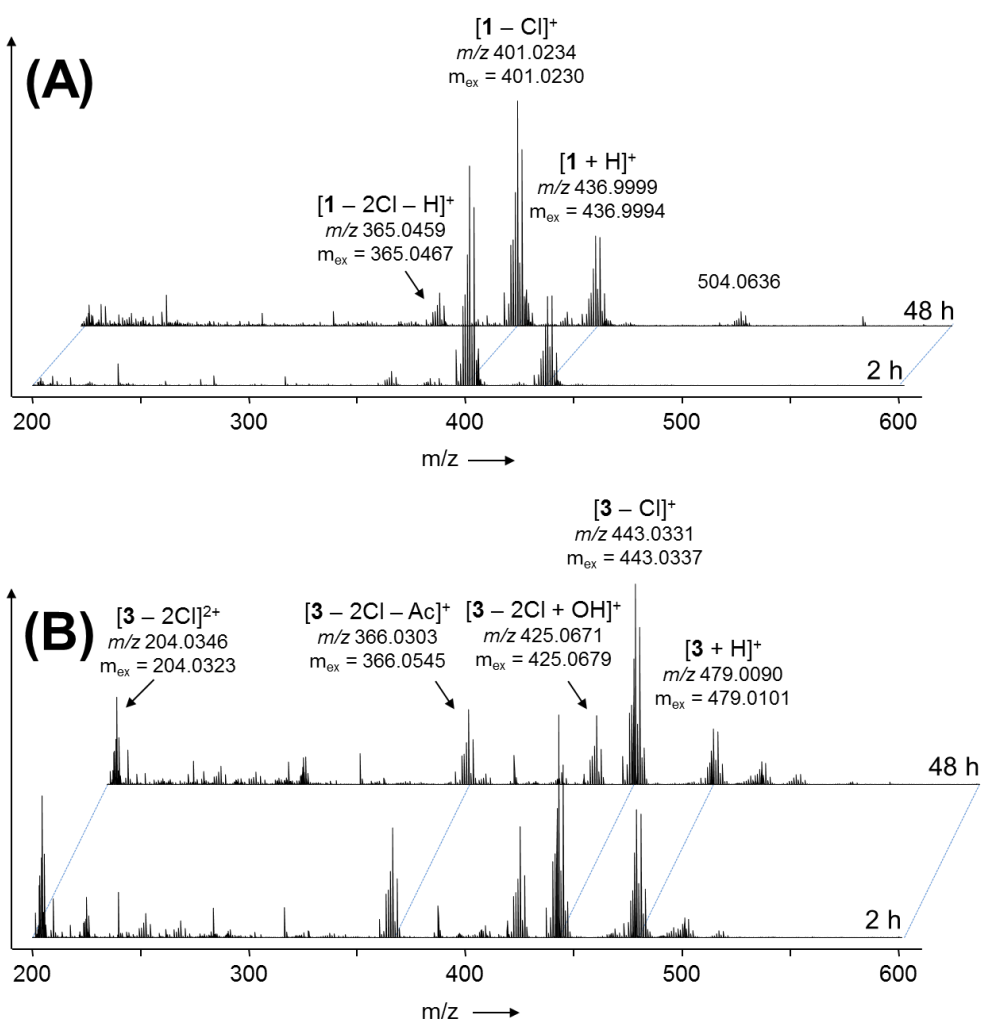

**Figure S8.** nESI-Q-TOF mass spectra of **1** (A) and **3** (B) in water after 2 and 48 h. The solutions were diluted with water prior to injection into the mass spectrometer.

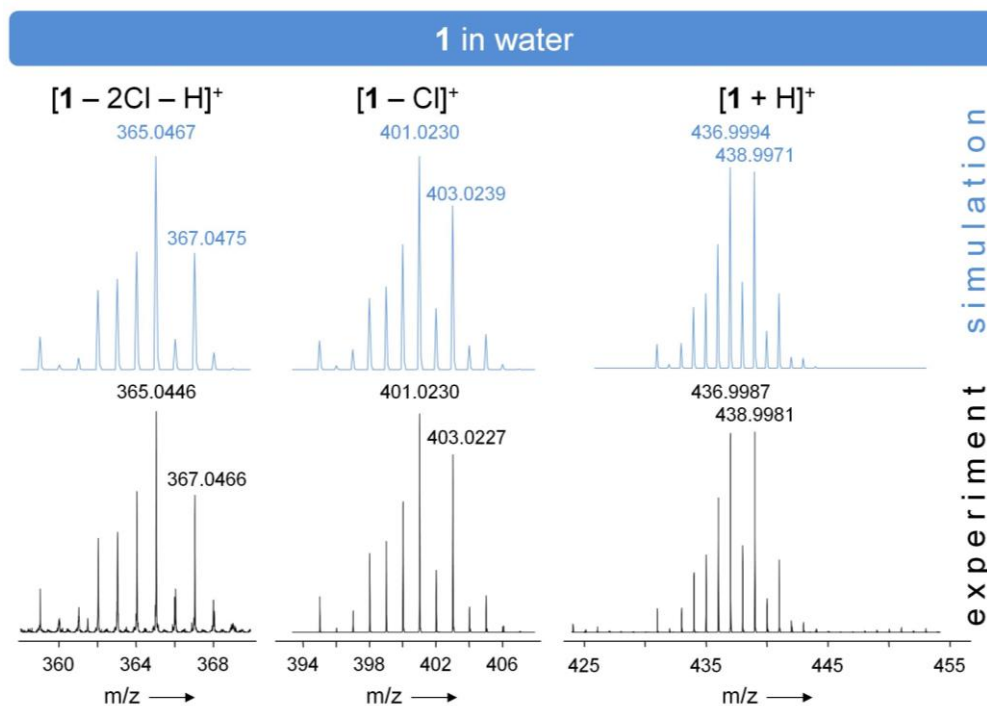

**Figure S9.** Experimental isotopic distributions and simulations of the mass signals of **1** in water.

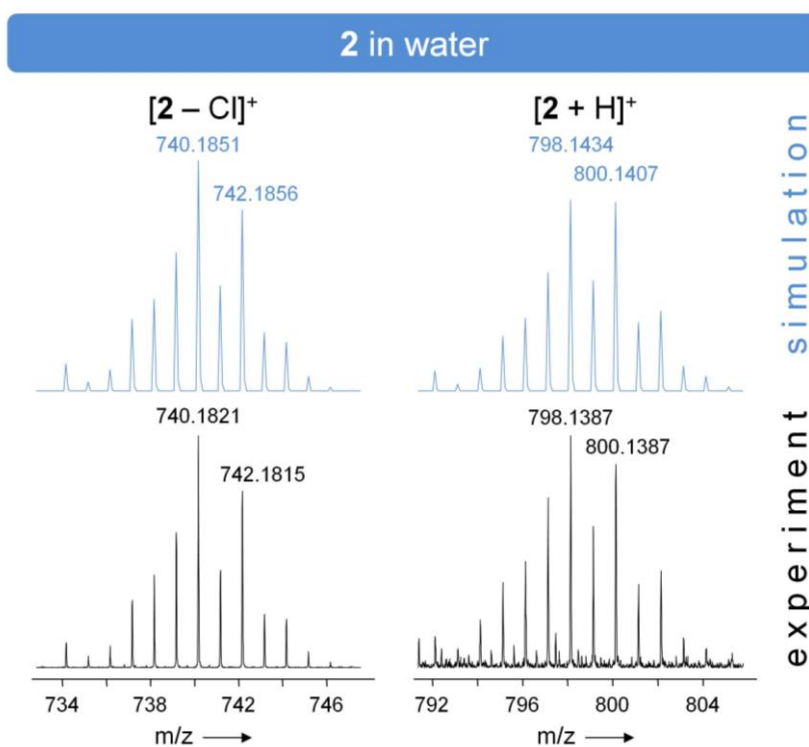

**Figure S10.** Experimental isotopic distributions and simulations of the mass signals of **2** in water.

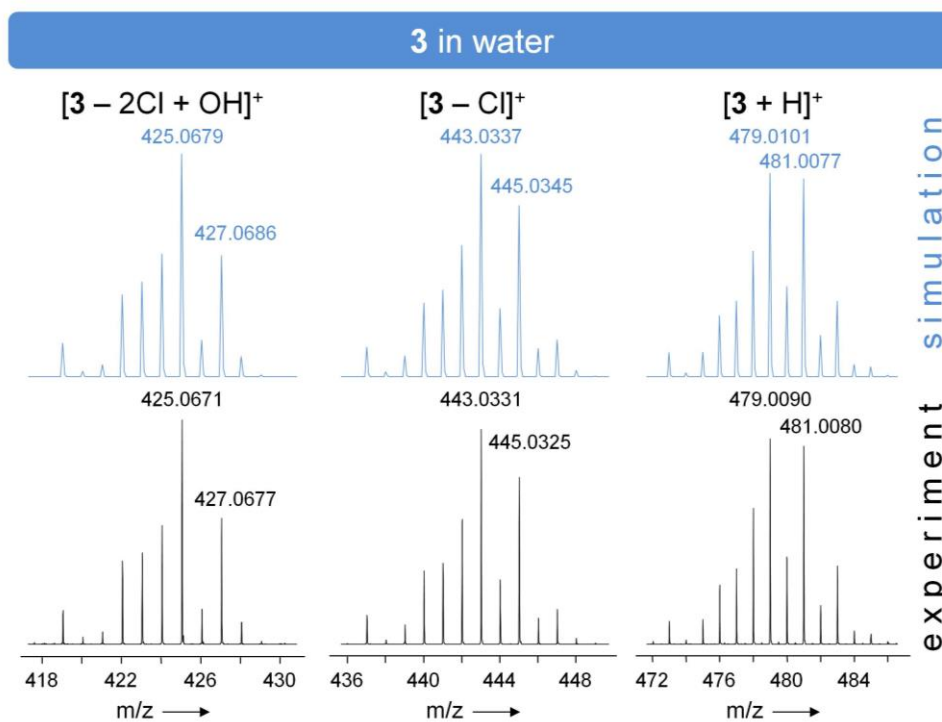

**Figure S11.** Experimental isotopic distributions and simulations of the mass signals of **3** in water.

**Table S3.** List of proteins identified by chemical proteomics. Numbers indicate spectral counts.

| Protein ID  | Description                                                 | Drug | Competition |
|-------------|-------------------------------------------------------------|------|-------------|
| RL23_HUMAN  | 60S ribosomal protein L23                                   | 14   | 14          |
| IKBL1_HUMAN | NF-kappa-B inhibitor-like protein 1                         | 3    | 7           |
| RL29_HUMAN  | 60S ribosomal protein L29                                   | 13   | 10          |
| ZN768_HUMAN | Zinc finger protein 768                                     | 5    | 2           |
| NUMA1_HUMAN | Nuclear mitotic apparatus protein 1                         | 10   | 12          |
| HSP76_HUMAN | Heat shock 70 kDa protein 6                                 | 4    | 5           |
| CLAP1_HUMAN | CLIP-associating protein 1                                  | 3    | 6           |
| CMS1_HUMAN  | Protein CMSS1                                               | 3    | 5           |
| KIF1B_HUMAN | Kinesin-like protein KIF1B                                  | 6    | 6           |
| BCD1_HUMAN  | Box C/D snoRNA protein 1                                    | 4    | 3           |
| SETX_HUMAN  | Probable helicase senataxin                                 | 5    | 5           |
| DBPA_HUMAN  | DNA-binding protein A                                       | 4    | 5           |
| ZEB2_HUMAN  | Zinc finger E-box-binding homeobox 2                        | 4    | 4           |
| RL18_HUMAN  | 60S ribosomal protein L18                                   | 4    | 6           |
| VIR_HUMAN   | Protein virilizer homolog                                   | 3    | 0           |
| RM34_HUMAN  | 39S ribosomal protein L34, mitochondrial                    | 4    | 5           |
| RRP1B_HUMAN | Ribosomal RNA processing protein 1 homolog B                | 4    | 1           |
| RL27_HUMAN  | 60S ribosomal protein L27                                   | 5    | 6           |
| H15_HUMAN   | Histone H1.5                                                | 5    | 3           |
| PTH_HUMAN   | Probable peptidyl-tRNA hydrolase                            | 5    | 4           |
| NXF1_HUMAN  | Nuclear RNA export factor 1                                 | 0    | 5           |
| RIF1_HUMAN  | Telomere-associated protein RIF1                            | 4    | 4           |
| HSP71_HUMAN | Heat shock 70 kDa protein 1A/1B                             | 4    | 5           |
| MK_HUMAN    | Midkine                                                     | 6    | 2           |
| TIF1B_HUMAN | Transcription intermediary factor 1-beta                    | 0    | 5           |
| TB10B_HUMAN | TBC1 domain family member 10B                               | 4    | 2           |
| T2FA_HUMAN  | General transcription factor IIF subunit 1                  | 8    | 9           |
| LS14B_HUMAN | Protein LSM14 homolog B                                     | 5    | 6           |
| ZN625_HUMAN | Zinc finger protein 625                                     | 4    | 6           |
| RS16_HUMAN  | 40S ribosomal protein S16                                   | 5    | 4           |
| ZN589_HUMAN | Zinc finger protein 589                                     | 4    | 5           |
| NOM1_HUMAN  | Nucleolar MIF4G domain-containing protein 1                 | 5    | 2           |
| PESC_HUMAN  | Pescadillo homolog                                          | 3    | 5           |
| PTRF_HUMAN  | Polymerase I and transcript release factor                  | 11   | 11          |
| RS19_HUMAN  | 40S ribosomal protein S19                                   | 6    | 4           |
| RM36_HUMAN  | 39S ribosomal protein L36, mitochondrial                    | 7    | 8           |
| UTP11_HUMAN | Probable U3 small nucleolar RNA-associated protein 11       | 3    | 0           |
| MET17_HUMAN | Methyltransferase-like protein 17, mitochondrial            | 2    | 6           |
| AGRIN_HUMAN | Agrin                                                       | 5    | 4           |
| ZN281_HUMAN | Zinc finger protein 281                                     | 5    | 5           |
| IF2G_HUMAN  | Eukaryotic translation initiation factor 2 subunit 3        | 0    | 4           |
| OZF_HUMAN   | Zinc finger protein OZF                                     | 5    | 5           |
| PSB5_HUMAN  | Proteasome subunit beta type-5                              | 0    | 6           |
| TCP4_HUMAN  | Activated RNA polymerase II transcriptional coactivator p15 | 4    | 5           |
| FA32A_HUMAN | Protein FAM32A                                              | 4    | 0           |
| H31_HUMAN   | Histone H3.1                                                | 4    | 1           |
| BLM_HUMAN   | Bloom syndrome protein                                      | 0    | 2           |
| UBP37_HUMAN | Ubiquitin carboxyl-terminal hydrolase 37                    | 1    | 4           |
| RM15_HUMAN  | 39S ribosomal protein L15, mitochondrial                    | 0    | 2           |
| RUFY2_HUMAN | RUN and FYVE domain-containing protein 2                    | 2    | 0           |



**Table S3. Continued**

|             |                                                          |    |    |
|-------------|----------------------------------------------------------|----|----|
| DDX47_HUMAN | Probable ATP-dependent RNA helicase DDX47                | 2  | 5  |
| SPT5H_HUMAN | Transcription elongation factor SPT5                     | 2  | 4  |
| RL21_HUMAN  | 60S ribosomal protein L21                                | 0  | 2  |
| SRFB1_HUMAN | Serum response factor-binding protein 1                  | 4  | 2  |
| RAM_HUMAN   | RNMT-activating mini protein                             | 0  | 2  |
| MET15_HUMAN | Probable methyltransferase-like protein 15               | 2  | 4  |
| NOP2_HUMAN  | Putative ribosomal RNA methyltransferase NOP2            | 0  | 2  |
| AFG32_HUMAN | AFG3-like protein 2                                      | 0  | 2  |
| JPH1_HUMAN  | Junctophilin-1                                           | 2  | 2  |
| MYL6B_HUMAN | Myosin light chain 6B                                    | 0  | 2  |
| SAMD1_HUMAN | Atherin                                                  | 5  | 5  |
| DDX49_HUMAN | Probable ATP-dependent RNA helicase DDX49                | 0  | 2  |
| C2D1A_HUMAN | Coiled-coil and C2 domain-containing protein 1A          | 2  | 2  |
| ZN248_HUMAN | Zinc finger protein 248                                  | 2  | 2  |
| ZC3H3_HUMAN | Zinc finger CCCH domain-containing protein 3             | 0  | 2  |
| SNUT2_HUMAN | U4/U6.U5 tri-snRNP-associated protein 2                  | 1  | 2  |
| SC24A_HUMAN | Protein transport protein Sec24A                         | 2  | 5  |
| NOG1_HUMAN  | Nucleolar GTP-binding protein 1                          | 0  | 2  |
| HXA5_HUMAN  | Homeobox protein Hox-A5                                  | 3  | 3  |
| PLK1_HUMAN  | Serine/threonine-protein kinase PLK1                     | 0  | 2  |
| SNUT1_HUMAN | U4/U6.U5 tri-snRNP-associated protein 1                  | 4  | 6  |
| RL19_HUMAN  | 60S ribosomal protein L19                                | 4  | 4  |
| ALKB2_HUMAN | Alpha-ketoglutarate-dependent dioxygenase alkB homolog 2 | 0  | 2  |
| GTPBA_HUMAN | GTP-binding protein 10                                   | 0  | 3  |
| FOXK1_HUMAN | Forkhead box protein K1                                  | 2  | 0  |
| ATPO_HUMAN  | ATP synthase subunit O, mitochondrial                    | 1  | 3  |
| HSPB1_HUMAN | Heat shock protein beta-1                                | 1  | 4  |
| GRP75_HUMAN | Stress-70 protein, mitochondrial                         | 2  | 3  |
| CLAP2_HUMAN | CLIP-associating protein 2                               | 3  | 5  |
| TAOK2_HUMAN | Serine/threonine-protein kinase TAO2                     | 0  | 2  |
| PHF6_HUMAN  | PHD finger protein 6                                     | 2  | 4  |
| UIF_HUMAN   | UAP56-interacting factor                                 | 4  | 2  |
| CC124_HUMAN | Coiled-coil domain-containing protein 124                | 4  | 4  |
| CDK13_HUMAN | Cyclin-dependent kinase 13                               | 0  | 3  |
| NEUA_HUMAN  | N-acylneuraminate cytidyltransferase                     | 1  | 2  |
| CHD7_HUMAN  | Chromodomain-helicase-DNA-binding protein 7              | 4  | 3  |
| MAP2_HUMAN  | Microtubule-associated protein 2                         | 1  | 4  |
| CGBP1_HUMAN | CGG triplet repeat-binding protein 1                     | 2  | 0  |
| FGFP3_HUMAN | Fibroblast growth factor-binding protein 3               | 2  | 0  |
| RS17_HUMAN  | 40S ribosomal protein S17                                | 4  | 0  |
| CR021_HUMAN | UPF0711 protein C18orf21                                 | 2  | 4  |
| FBRL_HUMAN  | rRNA 2'-O-methyltransferase fibrillarlin                 | 2  | 0  |
| HMGA2_HUMAN | High mobility group protein HMGI-C                       | 0  | 2  |
| PTN_HUMAN   | Pleiotrophin                                             | 5  | 3  |
| RL39_HUMAN  | 60S ribosomal protein L39                                | 21 | 15 |
| MO4L2_HUMAN | Mortality factor 4-like protein 2                        | 2  | 2  |
| SPT2_HUMAN  | Protein SPT2 homolog                                     | 4  | 2  |
| KLF12_HUMAN | Krueppel-like factor 12                                  | 2  | 4  |
| MBB1A_HUMAN | Myb-binding protein 1A                                   | 3  | 3  |
| CENPV_HUMAN | Centromere protein V                                     | 6  | 6  |
| THAP4_HUMAN | THAP domain-containing protein 4                         | 4  | 4  |
| HUTU_HUMAN  | Urocanate hydratase                                      | 2  | 0  |
| T53I2_HUMAN | Tumor protein p53-inducible nuclear protein 2            | 2  | 2  |
| CHM4B_HUMAN | Charged multivesicular body protein 4b                   | 2  | 0  |

**Table S3. Continued**

|             |                                                                                            |   |   |
|-------------|--------------------------------------------------------------------------------------------|---|---|
| SOX15_HUMAN | Protein SOX-15                                                                             | 0 | 2 |
| MA7D3_HUMAN | MAP7 domain-containing protein 3                                                           | 2 | 0 |
| GNL3_HUMAN  | Guanine nucleotide-binding protein-like 3                                                  | 2 | 0 |
| H2A1B_HUMAN | Histone H2A type 1-B/E                                                                     | 2 | 4 |
| ZN644_HUMAN | Zinc finger protein 644                                                                    | 0 | 2 |
| TR112_HUMAN | tRNA methyltransferase 112 homolog                                                         | 4 | 4 |
| CC152_HUMAN | Coiled-coil domain-containing protein 152                                                  | 2 | 3 |
| CE152_HUMAN | Centrosomal protein of 152 kDa                                                             | 0 | 2 |
| CD11B_HUMAN | Cyclin-dependent kinase 11B                                                                | 0 | 3 |
| CENPV_HUMAN | Centromere protein V                                                                       | 7 | 6 |
| PLCD3_HUMAN | 1-phosphatidylinositol 4,5-bisphosphate phosphodiesterase delta-3                          | 0 | 2 |
| ETV3_HUMAN  | ETS translocation variant 3                                                                | 0 | 2 |
| RL18A_HUMAN | 60S ribosomal protein L18a                                                                 | 2 | 4 |
| ZN771_HUMAN | Zinc finger protein 771                                                                    | 0 | 4 |
| ZN182_HUMAN | Zinc finger protein 182                                                                    | 0 | 2 |
| ARH40_HUMAN | Rho guanine nucleotide exchange factor 40                                                  | 0 | 3 |
| RBM42_HUMAN | RNA-binding protein 42                                                                     | 2 | 3 |
| PIAS2_HUMAN | E3 SUMO-protein ligase PIAS2                                                               | 2 | 3 |
| TSR1_HUMAN  | Pre-rRNA-processing protein TSR1 homolog                                                   | 1 | 3 |
| RS20_HUMAN  | 40S ribosomal protein S20                                                                  | 2 | 0 |
| ARRD1_HUMAN | Arrestin domain-containing protein 1                                                       | 1 | 0 |
| GFAP_HUMAN  | Glial fibrillary acidic protein                                                            | 2 | 1 |
| SALL4_HUMAN | Sal-like protein 4                                                                         | 4 | 4 |
| CHM2B_HUMAN | Charged multivesicular body protein 2b                                                     | 2 | 1 |
| NACA_HUMAN  | Nascent polypeptide-associated complex subunit alpha                                       | 3 | 3 |
| ZFY27_HUMAN | Protrudin                                                                                  | 2 | 2 |
| RM22_HUMAN  | 39S ribosomal protein L22, mitochondrial                                                   | 2 | 1 |
| RT14_HUMAN  | 28S ribosomal protein S14, mitochondrial                                                   | 0 | 2 |
| ZN664_HUMAN | Zinc finger protein 664                                                                    | 1 | 2 |
| CP087_HUMAN | UPF0547 protein C16orf87                                                                   | 1 | 1 |
| FGF2_HUMAN  | Fibroblast growth factor 2                                                                 | 2 | 2 |
| IF2A_HUMAN  | Eukaryotic translation initiation factor 2 subunit 1                                       | 1 | 1 |
| ARHG2_HUMAN | Rho guanine nucleotide exchange factor 2                                                   | 2 | 2 |
| SHRM3_HUMAN | Protein Shroom3                                                                            | 2 | 2 |
| SAS10_HUMAN | Something about silencing protein 10                                                       | 2 | 2 |
| GNA12_HUMAN | Guanine nucleotide-binding protein subunit alpha-12                                        | 0 | 1 |
| PHC2_HUMAN  | Polyhomeotic-like protein 2                                                                | 0 | 1 |
| SOST_HUMAN  | Sclerostin                                                                                 | 1 | 2 |
| SPS2L_HUMAN | SPATS2-like protein                                                                        | 1 | 1 |
| GTPB6_HUMAN | Putative GTP-binding protein 6                                                             | 0 | 1 |
| DDX54_HUMAN | ATP-dependent RNA helicase DDX54                                                           | 1 | 1 |
| AROS_HUMAN  | Active regulator of SIRT1                                                                  | 2 | 2 |
| LN28A_HUMAN | Protein lin-28 homolog A                                                                   | 1 | 0 |
| PDIA1_HUMAN | Protein disulfide-isomerase                                                                | 0 | 2 |
| SP9_HUMAN   | Transcription factor Sp9                                                                   | 1 | 0 |
| RMTL1_HUMAN | RNA methyltransferase-like protein 1                                                       | 1 | 0 |
| ZN655_HUMAN | Zinc finger protein 655                                                                    | 1 | 0 |
| CDC42_HUMAN | Cell division control protein 42 homolog                                                   | 2 | 2 |
| TAF6L_HUMAN | TAF6-like RNA polymerase II p300/CBP-associated factor-associated factor 65 kDa subunit 6L | 1 | 0 |
| SIR7_HUMAN  | NAD-dependent protein deacetylase sirtuin-7                                                | 0 | 1 |
| TCF7_HUMAN  | Transcription factor 7                                                                     | 1 | 1 |
| RS29_HUMAN  | 40S ribosomal protein S29                                                                  | 1 | 0 |

**Table S3. Continued**

|             |                                                            |   |   |
|-------------|------------------------------------------------------------|---|---|
| CHTOP_HUMAN | Chromatin target of PRMT1 protein                          | 0 | 1 |
| DDX3X_HUMAN | ATP-dependent RNA helicase DDX3X                           | 2 | 2 |
| TSNA1_HUMAN | t-SNARE domain-containing protein 1                        | 1 | 0 |
| FCF1_HUMAN  | rRNA-processing protein FCF1 homolog                       | 1 | 2 |
| ZN581_HUMAN | Zinc finger protein 581                                    | 1 | 2 |
| LRC41_HUMAN | Leucine-rich repeat-containing protein 41                  | 1 | 0 |
| CCDC8_HUMAN | Coiled-coil domain-containing protein 8                    | 0 | 1 |
| HMGN1_HUMAN | Non-histone chromosomal protein HMG-14                     | 1 | 0 |
| CA174_HUMAN | UPF0688 protein C1orf174                                   | 2 | 3 |
| PRPK_HUMAN  | TP53-regulating kinase                                     | 0 | 2 |
| NEP1_HUMAN  | Ribosomal RNA small subunit methyltransferase NEP1         | 2 | 1 |
| OTUD4_HUMAN | OTU domain-containing protein 4                            | 2 | 0 |
| NACC2_HUMAN | Nucleus accumbens-associated protein 2                     | 0 | 2 |
| MCES_HUMAN  | mRNA cap guanine-N7 methyltransferase                      | 0 | 1 |
| RT23_HUMAN  | 28S ribosomal protein S23, mitochondrial                   | 1 | 1 |
| RL13A_HUMAN | 60S ribosomal protein L13a                                 | 1 | 1 |
| IMA2_HUMAN  | Importin subunit alpha-2                                   | 0 | 1 |
| SERF2_HUMAN | Small EDRK-rich factor 2                                   | 0 | 1 |
| RT09_HUMAN  | 28S ribosomal protein S9, mitochondrial                    | 0 | 1 |
| RLA2_HUMAN  | 60S acidic ribosomal protein P2                            | 1 | 1 |
| PLEC_HUMAN  | Plectin                                                    | 1 | 2 |
| PTMS_HUMAN  | Parathyrosin                                               | 0 | 1 |
| IRS2_HUMAN  | Insulin receptor substrate 2                               | 0 | 2 |
| ZNF8_HUMAN  | Zinc finger protein 8                                      | 0 | 1 |
| ERI1_HUMAN  | 3'-5' exoribonuclease 1                                    | 0 | 1 |
| ANKZ1_HUMAN | Ankyrin repeat and zinc finger domain-containing protein 1 | 2 | 1 |
| GULP1_HUMAN | PTB domain-containing engulfment adapter protein 1         | 1 | 2 |
| BPTF_HUMAN  | Nucleosome-remodeling factor subunit BPTF                  | 1 | 0 |

## References

- 1 F. K. Cheung, C. Lin, F. Minissi, A. L. Crivillé, M. A. Graham, D. J. Fox and M. Wills, *Org. Lett.*, 2007, **9**, 4659-4662.
- 2 W. H. Ang, E. Daldini, L. Juillerat-Jeanneret and P. J. Dyson, *Inorg. Chem.*, 2007, **46**, 9048-9050.
- 3 D. J. Daigle, A. B. Pepperman and S. L. Vail, *J. Heterocycl. Chem.*, 1974, **11**, 407-408.
- 4 M. R. Pressprich and J. Chambers, Bruker Analytical X-ray systems, Madison, 2004.
- 5 G. M. Sheldrick, *Acta Crystallogr., Sect. A: Found. Crystallogr.*, 2008, **A64**, 112-122.
- 6 O. V. Dolomanov, L. J. Bourhis, R. J. Gildea, J. A. K. Howard and H. Puschmann, *J. Appl. Crystallogr.*, 2009, **42**, 339-341.
- 7 I. Le Trong, Z. Wang, D. E. Hyre, T. P. Lybrand, P. S. Stayton and R. E. Stenkamp, *Acta Crystallogr. Sect. D*, 2011, **67**, 813-821
- 8 H. M. Berman, J. Westbrook, Z. Feng, G. Gilliland, T. N. Bhat, H. Weissig, I. N. Shindyalov and P. E. Bourne, *Nuc.Acids Res.*, 2000, **28**, 235-242.
- 9 H. Berman, K. Henrick and H. Nakamura, *Nat. Struct. Biol.*, 2003, **10**, 980.
- 10 Fijitsu Limited, 2000 - 2007.
- 11 N. L. Allinger, *J. Am. Chem. Soc.*, 1977, **99**, 8127-8134.
- 12 G. Jones, P. Willet, R. C. Glen, A. R. Leach and R. Taylor, *J.Mol.Biol.*, 1997, **267**, 727-748.
- 13 M. D. Eldridge, C. Murray, T. R. Auton, G. V. Paolini and P. M. Mee, *J. Comp. Aid. Mol. Design*, 1997, **11**, 425-445.
- 14 M. L. Verdonk, J. C. Cole, M. J. Hartshorn, C. W. Murray and R. D. Taylor, *Proteins*, 2003, **52**, 609-623.
- 15 O. Korb, T. Stützle and T. E. Exner, *J. Chem. Inf. Model.*, 2009, **49**, 84-96.
- 16 W. T. M. Mooij and M. L. Verdonk, *Proteins*, 2005, **61**, 272-287.
- 17 K. L. Bennett, M. Funk, M. Tschernutter, F. P. Breitwieser, M. Planyavsky, C. U. Mohien, A. Muller, Z. Trajanoski, J. Colinge, G. Superti-Furga and U. Schmidt-Erfurth, *J. Proteomics*, 2011, **74**, 151-166.
- 18 J. V. Olsen, L. M. F. de Godoy, G. Q. Li, B. Macek, P. Mortensen, R. Pesch, A. Makarov, O. Lange, S. Horning and M. Mann, *Mol. Cell Proteomics*, 2005, **4**, 2010-2021.
- 19 J. Colinge, A. Masselot, M. Giron, T. Dessingy and J. Magnin, *Proteomics*, 2003, **3**, 1454-1463.
- 20 S. Naik, G. Bhattacharjya, B. Talukdar and Bhisma K. Patel, *Eur. J. Org. Chem.*, 2004, **2004**, 1254-1260.
